# Supplementary material for: Term-tissue specific models for prediction of gene ontology biological processes using transcriptional profiles of aging in drosophila melanogaster
Source: Springer Nature journal article supplement (doi:10.1186/1471-2105-9-129), 2008-02-28

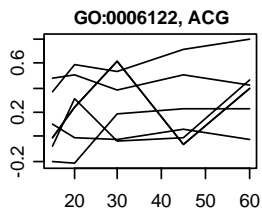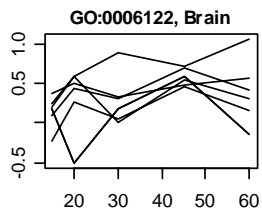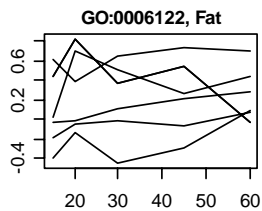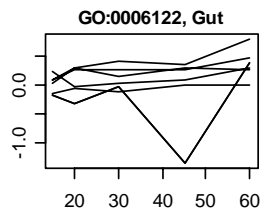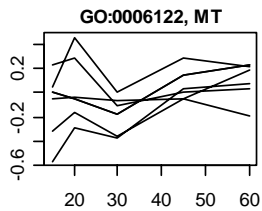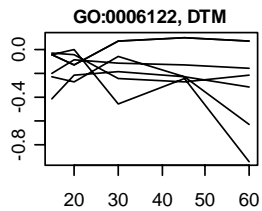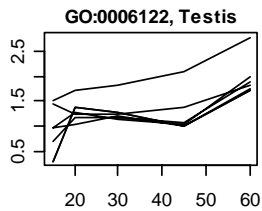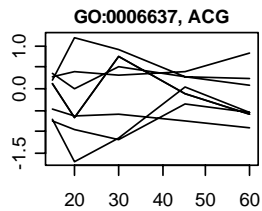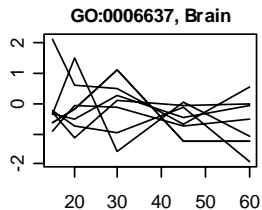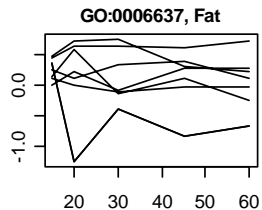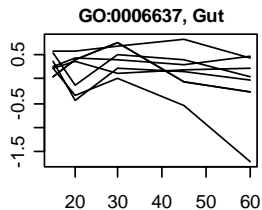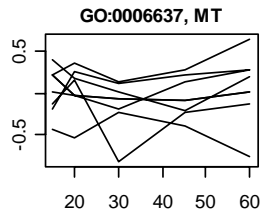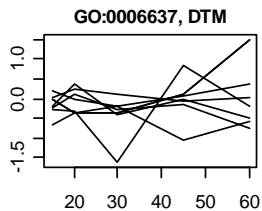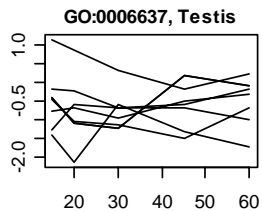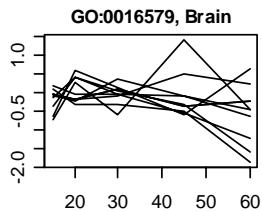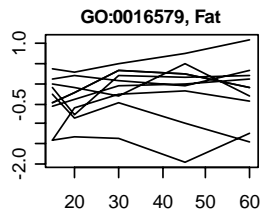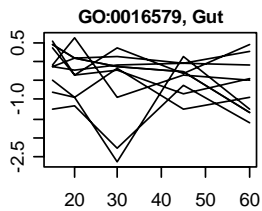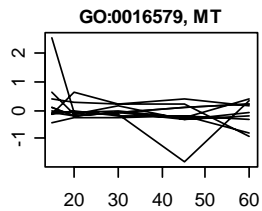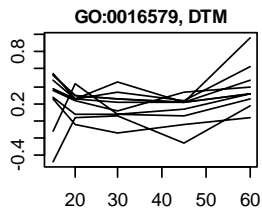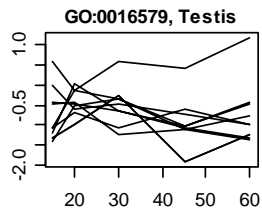

Supplement: 12859_2007_2114_MOESM2_ESM.pdf [file 12859_2007_2114_MOESM2_ESM.pdf]
